# Supplementary material
Source: PubMed Central journal article supplement (PMC4298658)

## **Supplementary Material**

### **Supplementary methods**

#### *Western blot analysis*

Cediranib-treated and control tumours were homogenized in non-denaturing lysis buffer (Cell Signaling Technology) containing 1x protease and phosphatase inhibitor cocktail (Roche). Protein concentrations were determined by BioRad™ protein assay (Biorad) and 30 µg of protein was separated by SDS PAGE using NuPAGE Novex 4-12% Bis-Tris precast gels and electrophoretically transferred to nitrocellulose membrane (0.2µm). Membranes were blocked using 3% ECL advance blocking reagent and probed with primary antibody in blocking buffer overnight at 4°C. Proteins were detected using HRP-conjugated secondary antibody (DAKO) and visualized with enhanced chemiluminescence reagents (GE Healthcare). Phospho-VEGFR2 and total-VEGFR2 antibodies were obtained from Cell Signaling Technology and β-actin antibody was obtained from Abcam.

**Supplementary figure 1.** Phosphorylation and expression levels of VEGFR2 in tumors of TH-MYCN mice after 2 and 7 days of daily treatment with 6mg/kg cediranib, determined using western blot analysis and compared to control tumors.  $\beta$ -actin was used as a loading control.

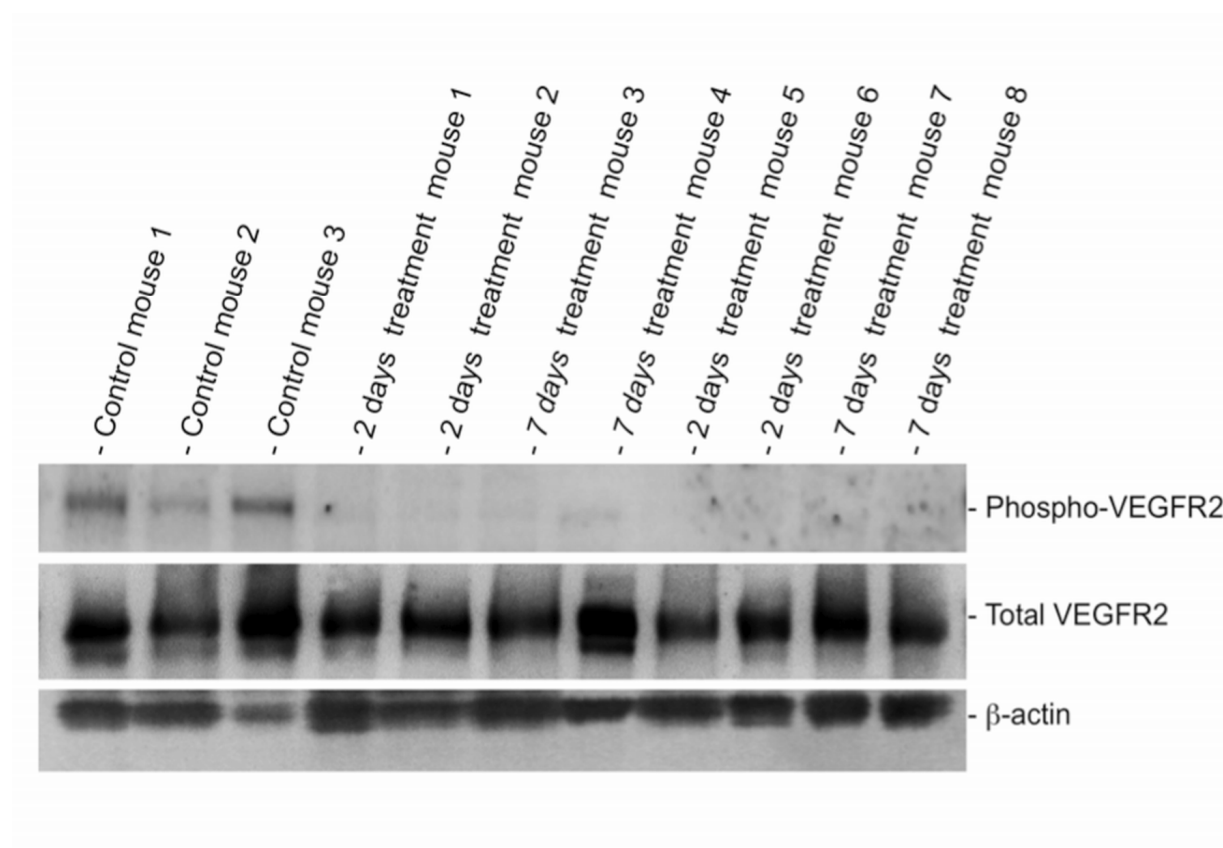

Supplement: NIHMS61826-supplement-01.pdf [file NIHMS61826-supplement-01.pdf]
